# Supplementary material for: Effect of Zea Mays-Beauveria Bassiana Seed Treatment on Spodoptera Frugiperda
Source: Preprints.org preprint supplement (doi:10.20944/preprints202101.0094.v1), 2021-01-05

Article

Supplementary data

**Figure 1.** Dimensions of Field trial 1.


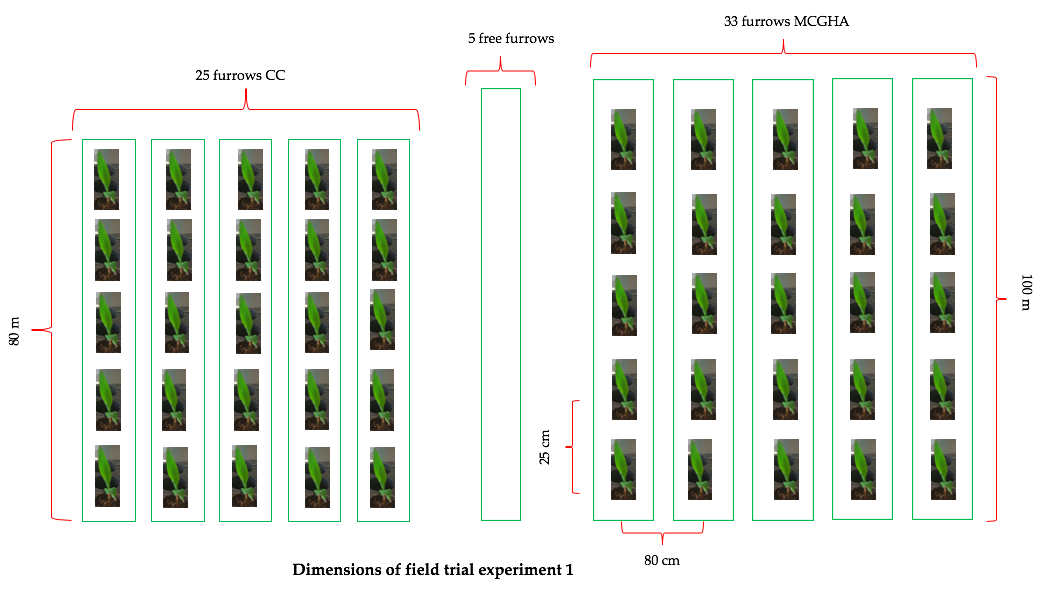


**Figure 2.** Dimension of Field trial 2.
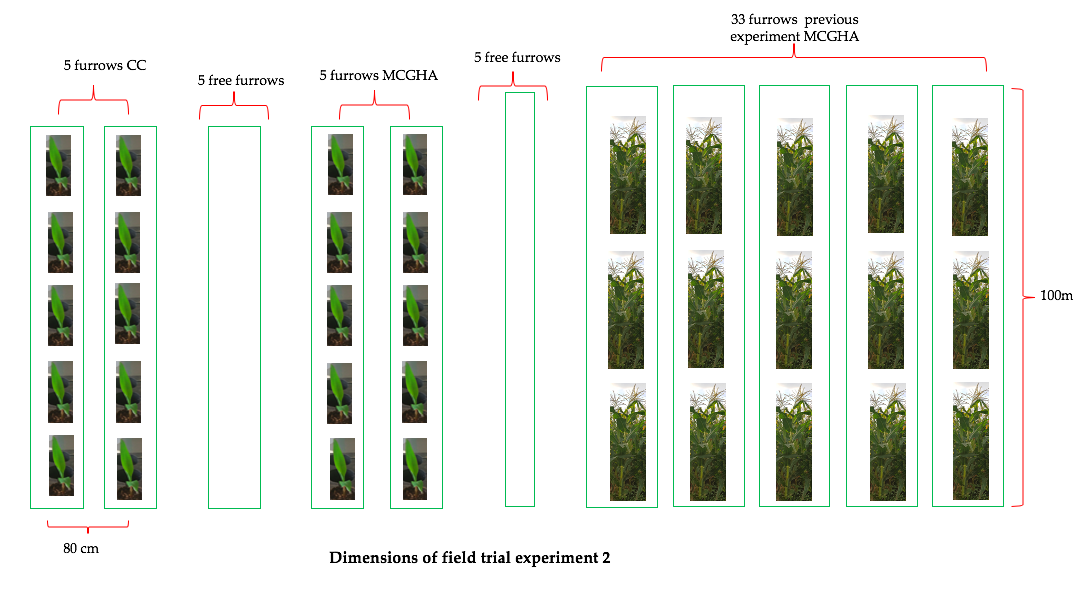


**Figure 3.** *S. frugiperda* larvae distribution in field trial experiment 1 and pictures of different larvae instars found.


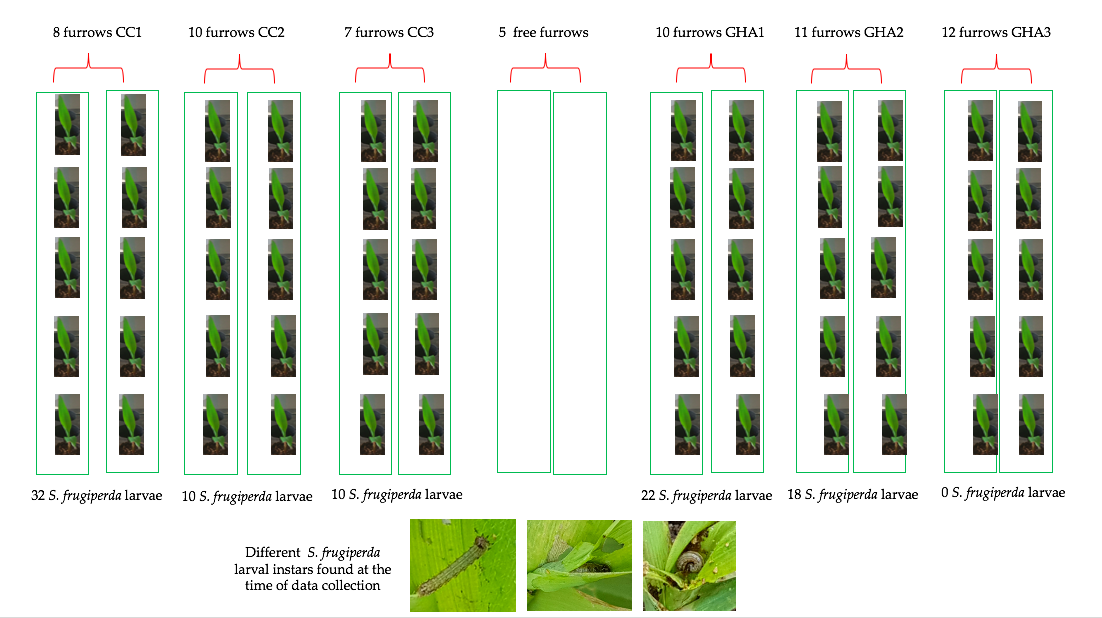


**Figure 4.** *B. bassiana* treated plants shown more than two corn cobs per plant.


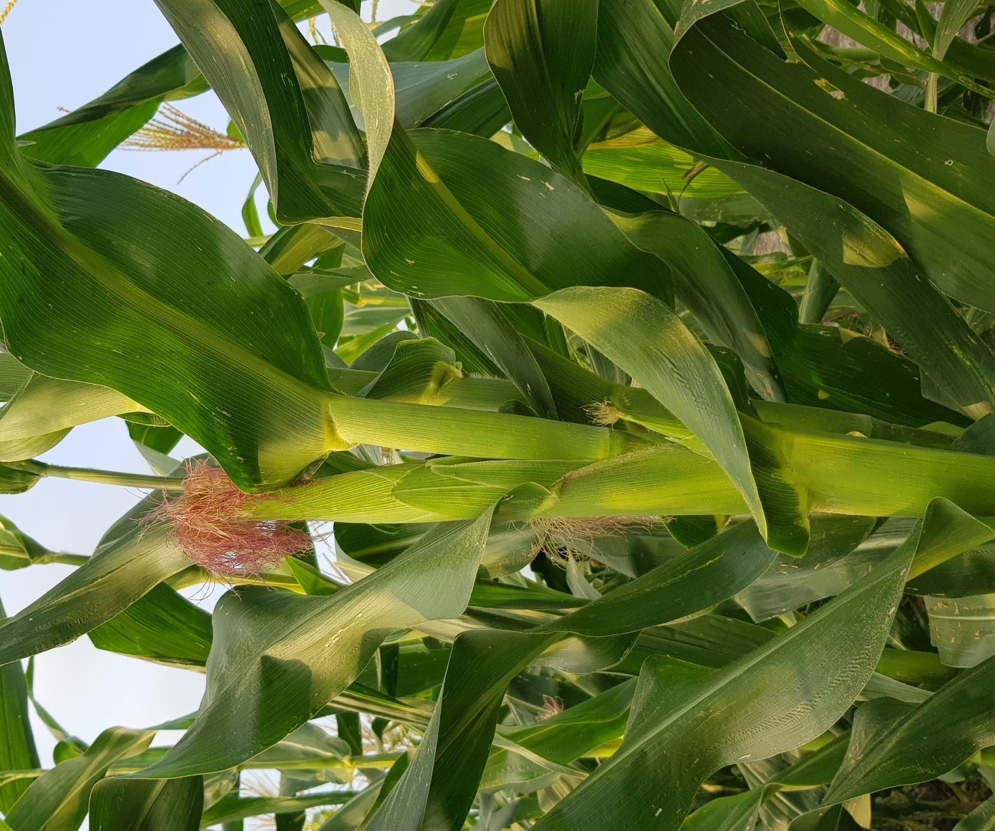


**Figure 5.** Insects observed during the field experiments.

| 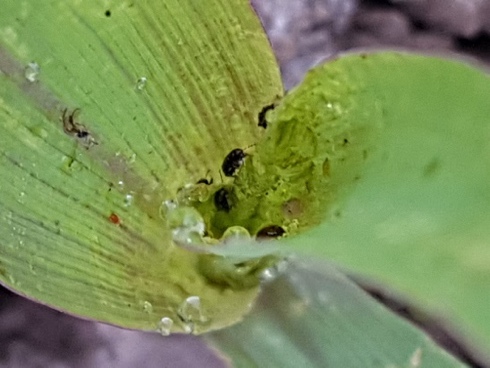 | 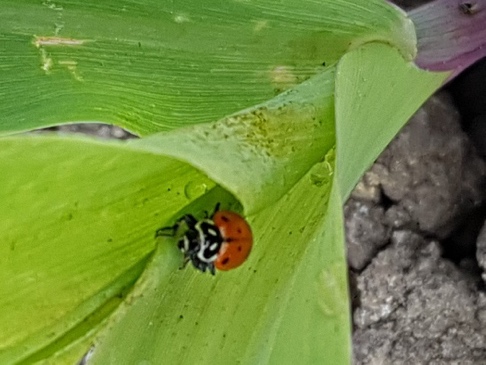 |
| --- | --- |
| 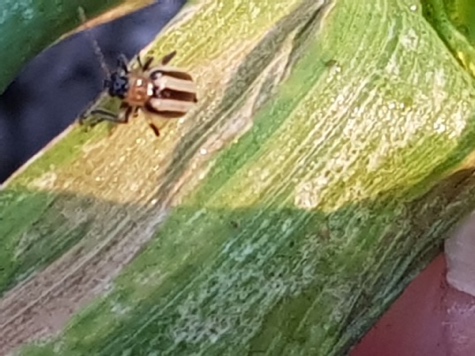 | 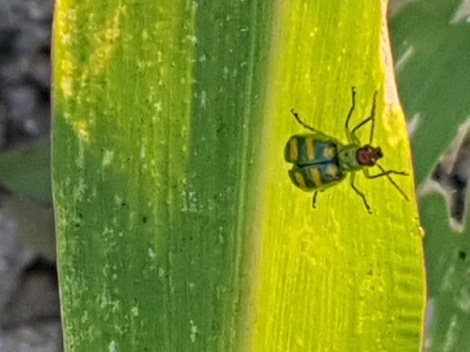 |
| 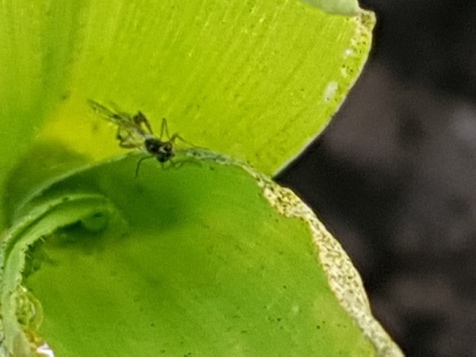 | 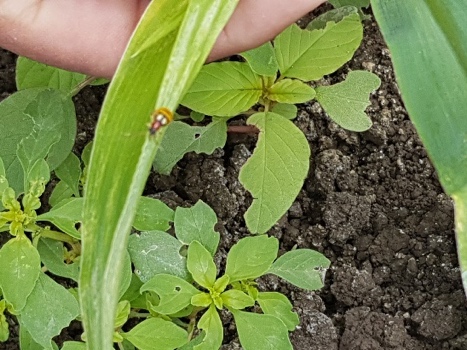 |
| 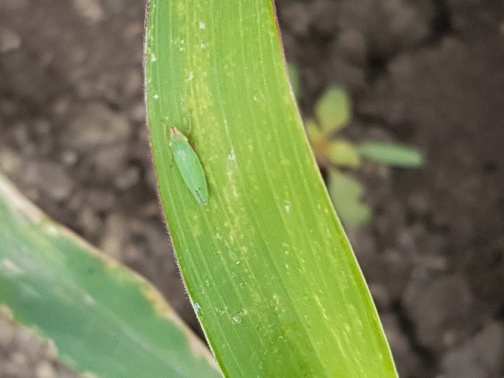 | 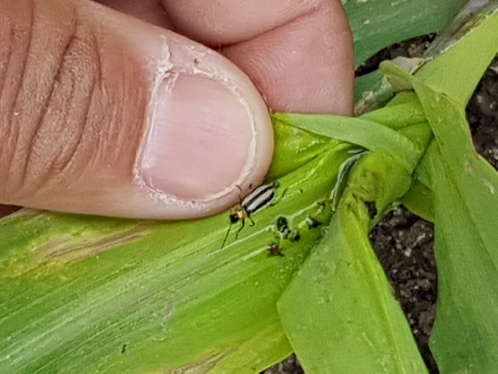 |
| 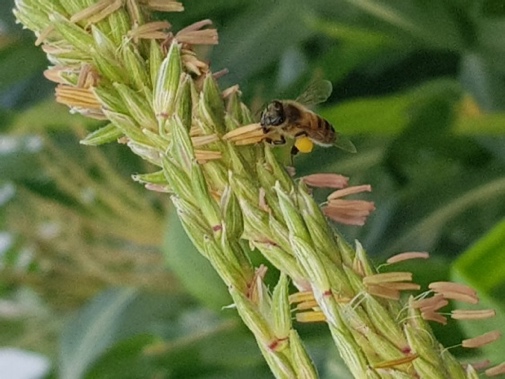 |  |

**Figure 6.** 3rd instar *S. frugiperda* larva onto artificial diet.


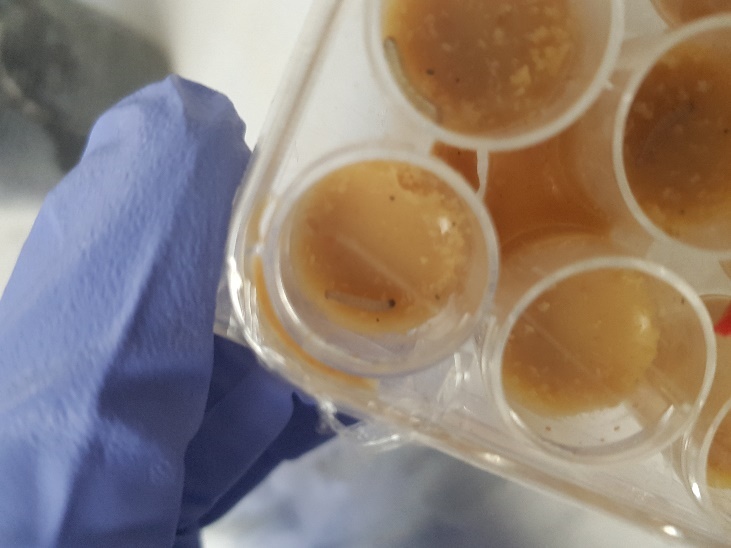


**Figure 7.** *S. frugiperda* larva in *Z. mays* plant covered with a mesh cage.


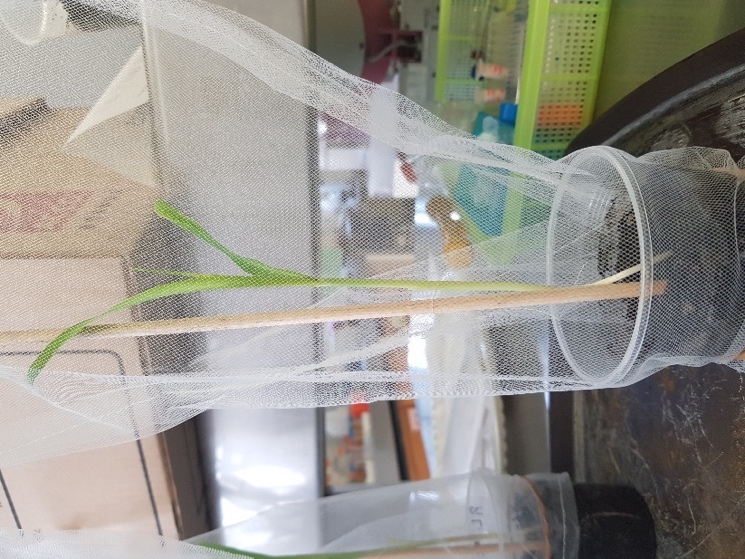

Supplement: Supplementary file 4 [file supplementary]
